# Supplementary material for: A coumarin Schiff's base two-photon fluorescent probe for hypochlorite in living cells and zebrafish
Source: Royal Society of Chemistry journal article supplement (doi:10.1039/c8ra00093j), 2018-01-01
Supplement: c8ra00093j1.pdf [file c8ra00093j1.pdf]

**A coumarin schiff's base two-photon fluorescent probe for hypochlorite in living cell and zebrafish**

Kangnan Wang<sup>a,b</sup>, Pengzhen Sun<sup>c</sup>, Xijuan Chao<sup>b</sup>, Duxia Cao<sup>a,\*</sup>, Zongwan Mao<sup>b,\*</sup>,  
Zhiqiang Liu<sup>d,\*</sup>

<sup>a</sup>School of Materials Science and Engineering, University of Jinan, Jinan 250022, China. E-mail addresses: [duxiacao@ujn.edu.cn](mailto:duxiacao@ujn.edu.cn)

<sup>b</sup>MOE Key Laboratory of Bioinorganic and Synthetic Chemistry, School of Chemistry and Chemical Engineering, Sun Yat-sen University, Guangzhou 510275, China. E-mail addresses: [cesmzw@mail.sysu.edu.cn](mailto:cesmzw@mail.sysu.edu.cn)

<sup>c</sup>School of Pharmacy, Guangdong Pharmaceutical University, Guangzhou 510006, China

<sup>d</sup>State Key Laboratory of Crystal Materials, Shandong University, Jinan 250100, Shandong, China. E-mail addresses: [zqliu@sdu.edu.cn](mailto:zqliu@sdu.edu.cn)

**Supporting information**

- 1. Fluorescence selectivity of probe 1 for ClO<sup>-</sup>**
- 2. Mass spectra of probe 1 before and after the addition of ClO<sup>-</sup>**
- 3. Survivability of A549 cells after treatment with indicated various concentrations of probe 1**
- 4. One-photon microscopy confocal fluorescence images of A549 cells and zebrafish after incubated with probe 1 for a series of time gradient**
- 5. One-photon microscopy confocal fluorescence images of A549 cells and zebrafish after incubated with probe 1 and subsequently with ClO<sup>-</sup> for a series of time gradient**

## 1. Fluorescence selectivity of probe 1 for ClO<sup>-</sup>

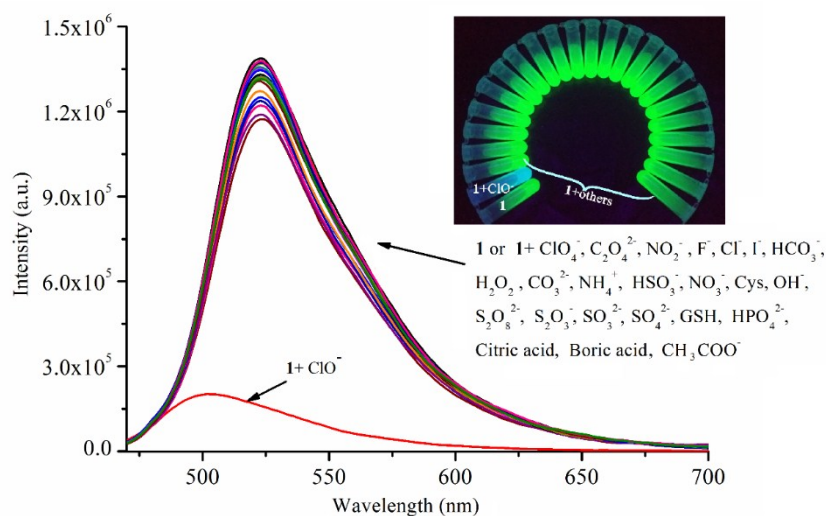

Fig. S1 Fluorescence spectra of probe 1 (10 μM) in the absence and presence of various analytes (150 μM) in potassium phosphate buffer (pH 7.4, containing 40% CH<sub>3</sub>OH as co-solvent). Inset: a visual fluorescence change photograph.

## 2. Mass spectra of probe 1 before and after the addition of ClO<sup>-</sup>

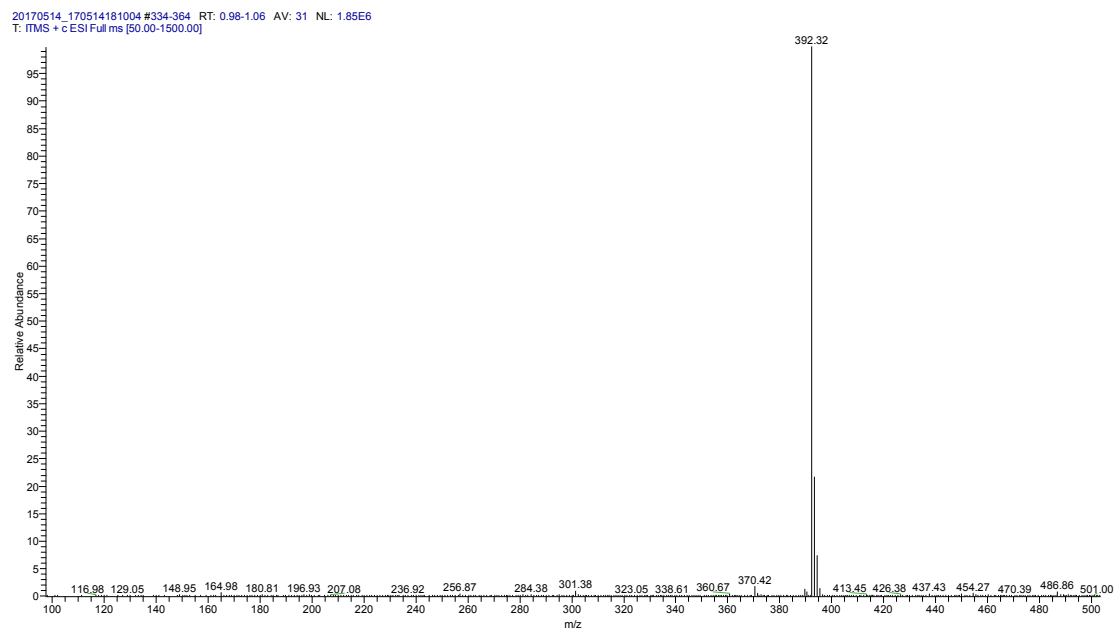

(a)

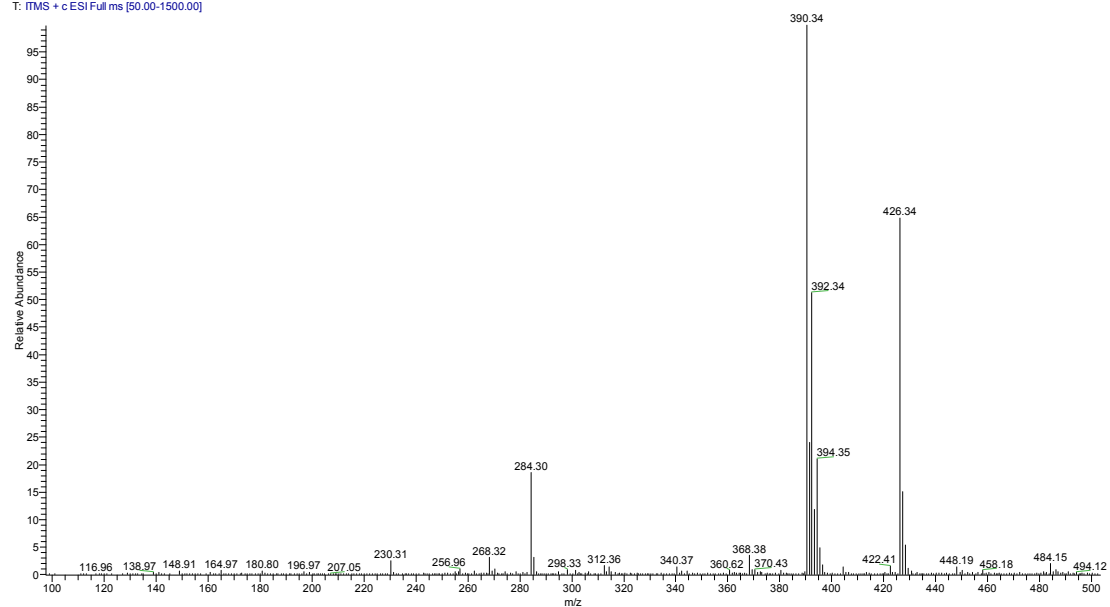

(b)

Fig. S2 Mass spectra of probe 1 before (a) and after (b) the addition of  $\text{ClO}^-$ .

### 3. Survivability of A549 cells after treatment with indicated various concentrations of probe 1

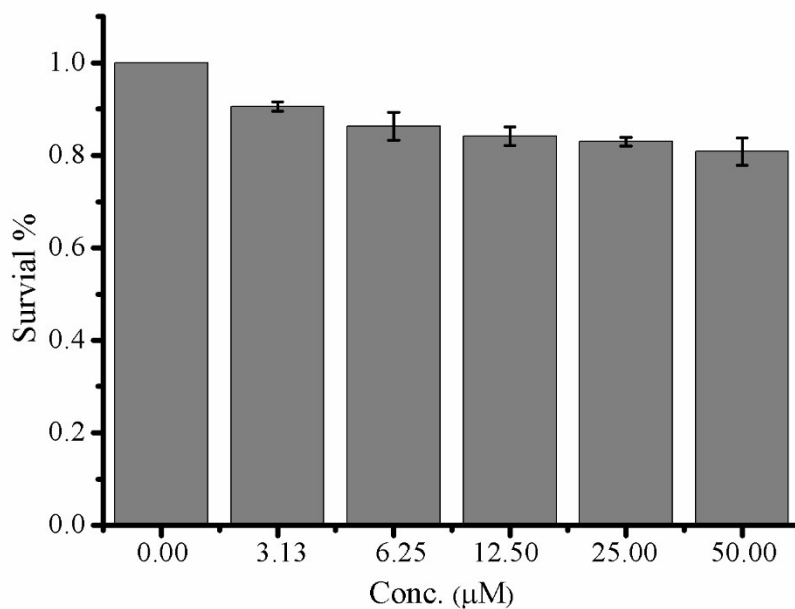

Fig. S3 Survivability of A549 cells after treatment with indicated various concentrations of probe 1.

---

**4. One-photon microscopy confocal fluorescence images of A549 cells and zebrafish after incubated with probe 1 for a series of time gradient**

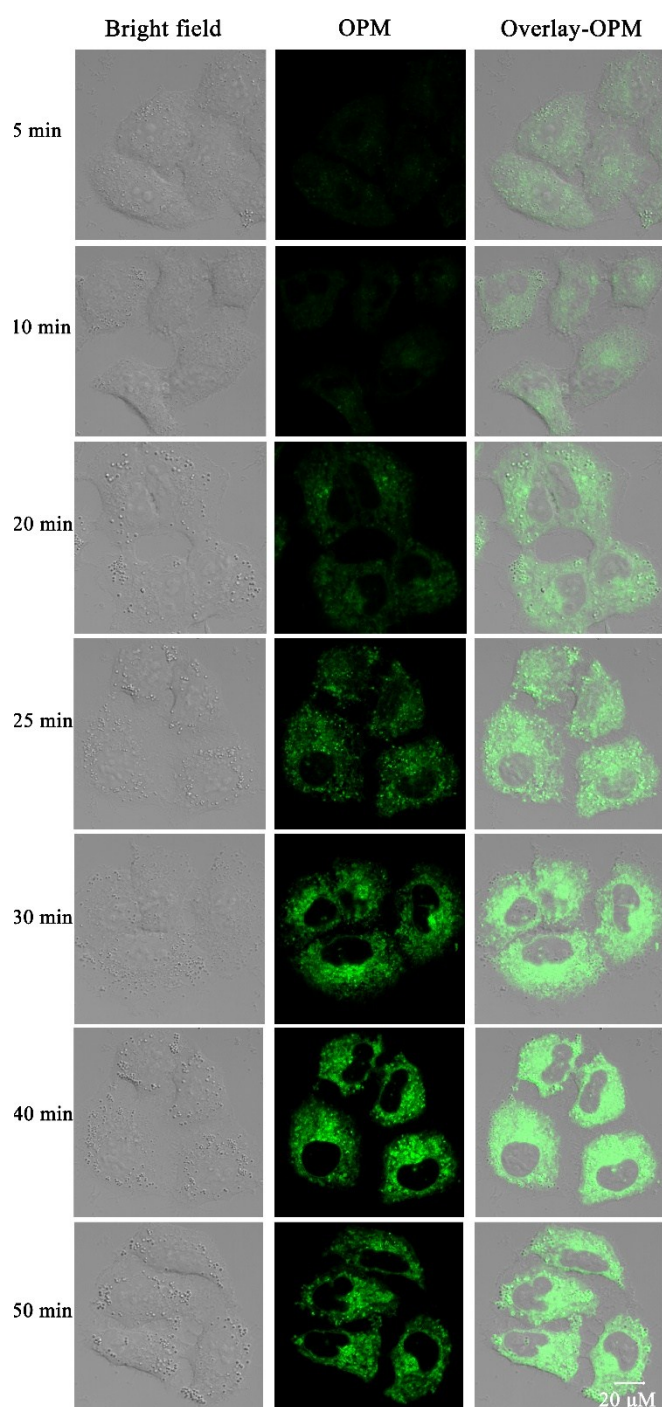

Fig. S4 One-photon microscopy (OPM) confocal fluorescence images of A549 cells after incubated with probe 1 (20 μM) for a series of gradient times excited at 458 nm (OPM). The emission was collected at 520±30 nm. Overlay-OPM: Overlay of the Bright field and OPM columns.

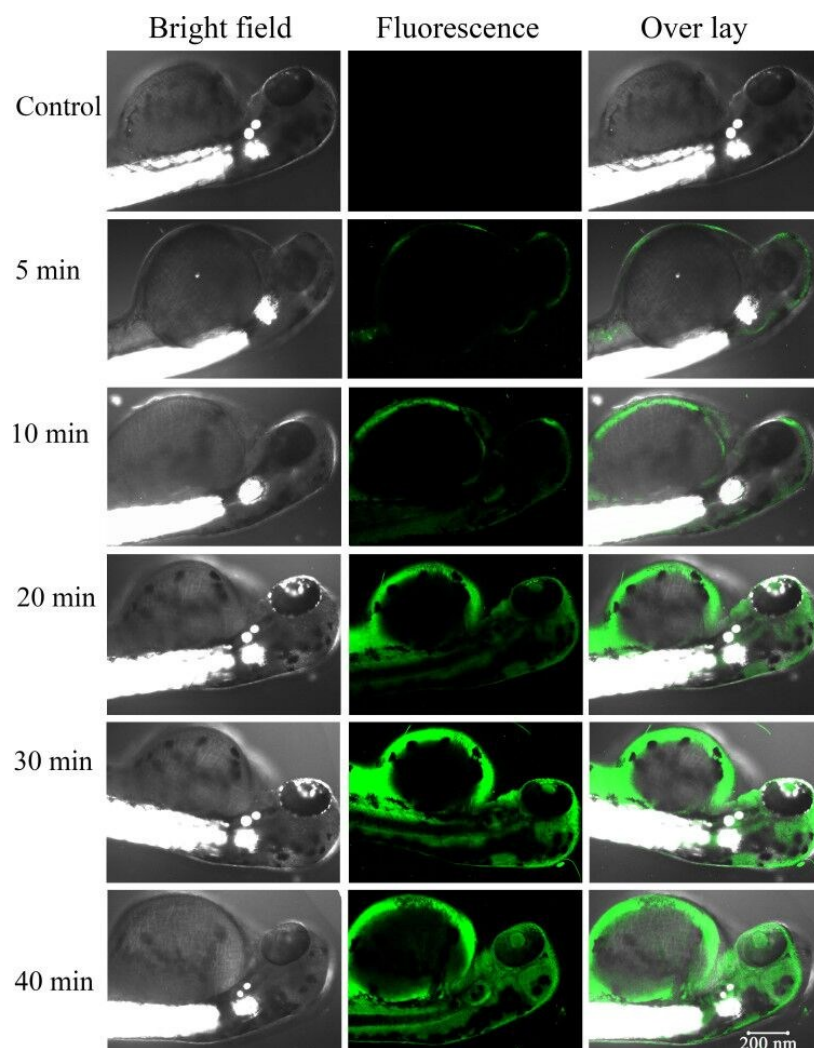

Fig. S5 Images of zebrafish treated with 20  $\mu$ M probe 1 for a series of gradient times. The probe was excited at 458 nm (OPM). The emission was collected at 520 $\pm$ 30 nm. Overlay-OPM: Overlay of the Bright field and OPM columns.

**5. One-photon microscopy confocal fluorescence images of A549 cells and zebrafish after incubated with probe 1 and subsequently with  $\text{ClO}^-$  for a series of time gradient**

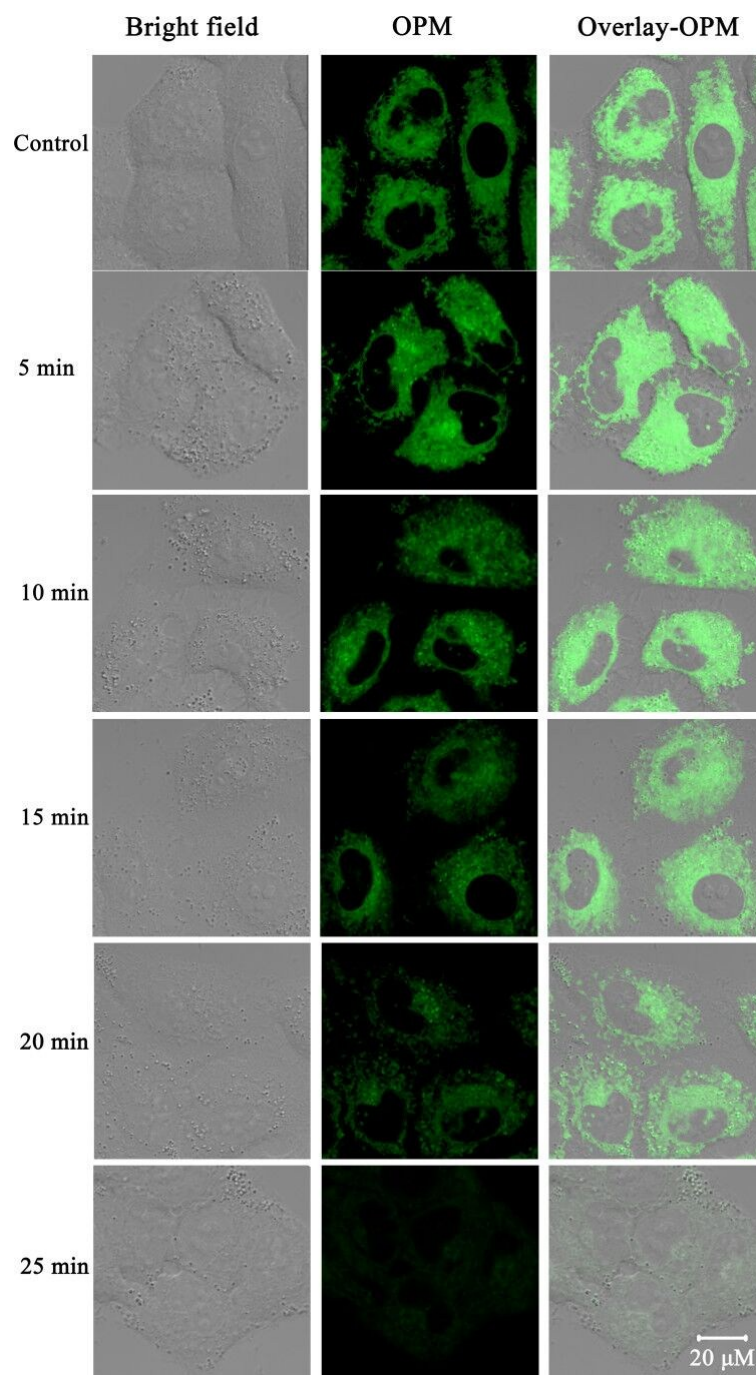

Fig. S6 One-photon microscopy (OPM) confocal fluorescence images of A549 cells after incubated with probe 1 (20  $\mu\text{M}$ ) for 30 min and subsequently with  $\text{ClO}^-$  (120 equiv.) for a series of time gradient excited at 458 nm (OPM). The emission was collected at  $520\pm 30$  nm. Overlay-OPM: Overlay of the Bright field and OPM columns.



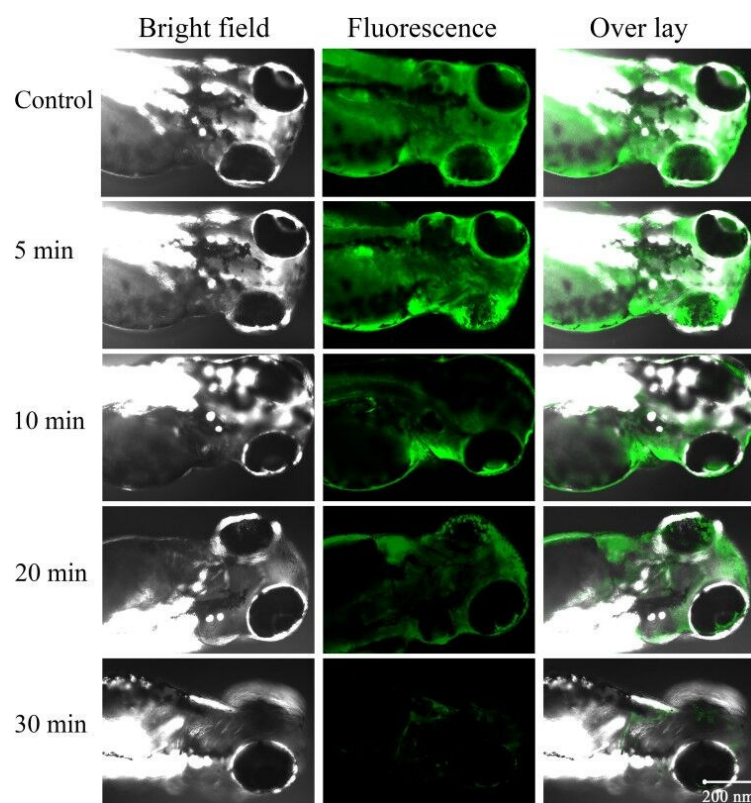

Fig. S7 Images of zebrafish treated with 20  $\mu\text{M}$  probe **1** in the presence of 120 equiv.  $\text{ClO}^-$  for a series of time gradient. The probe was excited at 458 nm (OPM). The emission was collected at  $520 \pm 30$  nm. Overlay-OPM: Overlay of the Bright field and OPM columns.
